# Supplementary material
Source: PubMed Central journal article supplement (PMC3982980)
Supplement: ac5001477_si_002.pdf [file ac5001477_si_002.pdf]

# SI Tables 1-5

**Title of paper: Effects of Calibration Approaches on the Accuracy for LC-MS Targeted Quantification of Therapeutic Protein**

*Eslam Nouri-Nigjeh<sup>1,2,#</sup>, Ming Zhang<sup>1,2,#</sup>,<sup>1</sup>Tao Ji, Haoying Yu<sup>1,2</sup>, An Bo<sup>1,2</sup>, Xiaotao Duan<sup>1,2</sup>, Joseph Balthasar<sup>1,2</sup>, Robert W. Johnson<sup>\*3</sup>, and Jun Qu<sup>\*1,\*</sup>*

<sup>1</sup> The Department of Pharmaceutical Sciences, University at Buffalo, State University of New York, Amherst, NY 14260

<sup>2</sup> New York State Center of Excellence in Bioinformatics and Life Sciences, Buffalo, NY 14203

<sup>3</sup> Abbvie, 1 North Waukegan Road, North Chicago, IL 60064-6101

**SI Table 1. Signature peptide (SP) candidates for HCV mAb<sup>a,b</sup>**

| Peptide                    | Charge state | Precursor (m/z) | Top 5 product ions                      |
|----------------------------|--------------|-----------------|-----------------------------------------|
| <b>Light Chain</b>         |              |                 |                                         |
| VDNALQSGNSQESVTEQDSK       | 2            | 1069.00         | 707.3, 1495.6, 893.4, 1408.8, 1022.5    |
| TVAAPSVFIFPPSDEQLK         | 2            | 974.03          | 913.4, 1060.5, 802.6, 1320.7, 1173.6    |
| VDNALQSGNSQESVTEQDSK       | 3            | 713.00          | 748.5, 641.3, 812.3, 606.3, 513.2       |
| TVAAPSVFIFPPSDEQLK         | 3            | 649.29          | 457.4, 913.5, 517.4, 530.7, 443.8       |
| VYACEVTHQGLSSPVTK          | 3            | 626.32          | 807.4, 772.2, 889.1, 692.0, 527.5       |
| VYACEVTHQGLSSPVTK          | 2            | 938.97          | 788.4, 1154.7, 1053.5, 1088.5, 444.3    |
| SSQSLVYSNGNTYLHWYLQKPGQSPK | 3            | 995.17          | 1191.4,1241.0,1109.8,1066.3,1182.5      |
| DSTYLSSTLTLSK              | 2            | 751.89          | 734.0, 836.5, 1036.5, 642.1, 448.2      |
| DSTYLSSTLTLSK              | 3            | 501.60          | 489.7, 83.7, 477.4, 519.4, 448.2        |
| SSQSLVYSNGNTYLHWYLQKPGQSPK | 2            | 1492.31         | 613.3,1468.8,1331.7,1331.7,741.4        |
| <b>Heavy Chain</b>         |              |                 |                                         |
| GPSVFPLAPSSK               | 2            | 593.83          | 699.3,846.4,470.2,585.0,418.2           |
| FNWYVDGVEVHNAK             | 3            | 559.94          | 708.8,616.0,534.3,262.1,766.6           |
| FNWYVDGVEVHNAK             | 2            | 839.41          | 968.5,1067.5,697.3,1230.7,708.8         |
| GGTGYWGQGTTLTVSSASTK       | 2            | 980.49          | 1337.7,780.3,1152.6,580.3,604.2         |
| VVSVLTVLHQDWLNGK           | 3            | 603.68          | 805.4,712.7,656.2,531.6,762.2           |
| GPSVFPLAPSSK               | 1            | 1186.65         | 699.4,751.4,769.5,846.4,418.2,          |
| STSGGTAALGCLVK             | 2            | 661.35          | 576.3,760.4,689.3,567.5,519.3           |
| VVSVLTVLHQDWLNGK           | 2            | 905.01          | 997.4,1110.5,617.3,1191.7,1310.7        |
| TPEVTCVVVDVSHEDPEVK        | 3            | 714.02          | 834.6,472.3,856.9,906.7,970.9           |
| FAFSLETSASTAYLQINNLIK      | 3            | 740.40          | 488.2,729.3,992.2,601.3,865.8,          |
| GGTGYWGQGTTLTVSSASTK       | 3            | 653.66          | 681.5,580.3,493.2,641.0,804.1,780.4     |
| TPEVTCVVVDVSHEDPEVK        | 2            | 1070.52         | 1667.7,472.3,1039.5,1154.5,940.5,1253.6 |
| FAFSLETSASTAYLQINNLIK      | 2            | 1110.09         | 1005.5,842.4,729.4,601.4,1264.6         |
| STSGGTAALGCLVK             | 3            | 441.23          | 576.3,588.4,373.6,633.1,567.5           |
| TTPPVLDSDGSFFLYSK          | 2            | 937.98          | 836.7,1265.5,1378.8,827.4,1150.6        |
| NEDTATYFCTR                | 2            | 689.30          | 583.2,847.4,746.3,1134.5,436.1          |
| EEQYNSTYR                  | 2            | 595.26          | 526.2,369.1,640.3,803.3,532.1           |
| TTPPVLDSDGSFFLYSK          | 3            | 625.32          | 827.7,836.3,609.2,821.2,657.5           |
| NEDTATYFCTR                | 1            | 1377.57         | 1019.4,1134.5,1001.6,1116.6,847.4       |

<sup>a</sup> In total, more than 85% sequence coverage was achieved. Peptides that are not unique to HCV-mAb, or containing labile residues, known modification sites or missed cleavage were removed.

<sup>b</sup> The top 2 most intensive charge states of each candidate were investigated. The peptide/charge combinations were sorted by the abundances of precursor peak, from high to low.

**SI Table 2. Actual purities of the standards as quantified by quantitative amino acid analysis (AAA, N=6). All standards were labeled as >95% in purity by the providers.**

|      | HCV-mAb<br>(Full-length<br>protein) | GPS | TVA | Extended-GPS | Extended-TVA |
|------|-------------------------------------|-----|-----|--------------|--------------|
| Mean | 78%                                 | 90% | 65% | 75%          | 97%          |
| RSD% | 3%                                  | 9%  | 8%  | 6%           | 3%           |

**SI Table 3. Validation of the peptide-, extended-peptide- and protein-level calibration approaches using QC spiked with *their respective calibrators* into blank plasma sample (N=6)<sup>a,b,c</sup>.**

| Calibration approaches                                                                         | Signature peptide | Range (µg/ml) | R <sup>2</sup> | Accuracy  |          |          | Precision |          |          |
|------------------------------------------------------------------------------------------------|-------------------|---------------|----------------|-----------|----------|----------|-----------|----------|----------|
|                                                                                                |                   |               |                | 1.6 µg/ml | 10 µg/ml | 80 µg/ml | 1.6 µg/ml | 10 µg/ml | 80 µg/ml |
| <b>Protein calibrator with SIL-protein I.S. (Protein-spiked QC)</b>                            | GPS               | 0.1~200       | >0.9953        | 91%       | 96%      | 97%      | 3%        | 7%       | 6%       |
|                                                                                                | TVA               | 0.1~200       | >0.9932        | 90%       | 96%      | 106%     | 4%        | 9%       | 3%       |
| <b>Extended-peptide calibrator with SIL-extended-peptide I.S. (Extended-peptide-spiked QC)</b> | GPS               | 0.1~200       | >0.9963        | 98%       | 88%      | 98%      | 7%        | 3%       | 3%       |
|                                                                                                | TVA               | 0.1~200       | >0.9931        | 101%      | 86%      | 99%      | 5%        | 3%       | 3%       |
| <b>Peptide calibrator with SIL-peptide I.S. (Peptide-spiked QC)</b>                            | GPS               | 0.1~200       | >0.9974        | 96%       | 103%     | 103%     | 5%        | 6%       | 4%       |
|                                                                                                | TVA               | 0.1~200       | >0.9915        | 98%       | 96%      | 100%     | 7%        | 8%       | 5%       |

<sup>a</sup> QC samples were prepared by spiking pure protein (before sample preparation, for protein calibration), synthesized extended-peptides (spiked before digestion, for extended-peptide calibration) or peptides (spiked after digestion, for peptide-level calibration) into blank rat plasma at three levels: 1.6, 10 and 80 µg/mL protein or **equal molarities** of peptides/extended peptides.

<sup>b</sup> Each sample was analyzed three times in each of two different days (day 1 and day 14).

<sup>c</sup> The purities of all standards were accurately measured by quantitative AAA procedure.

**SI Table 4. Investigation of the accuracy and precision of the five calibration approaches using QC prepared by spiking pure protein into blank plasma (N=6)<sup>a, b, c</sup>. The data is also illustrated in Fig. 3.**

| Calibration methods                                        | Signature peptide | Range (µg/ml protein) | R <sup>2</sup> | Accuracy  |          |          | Precision |          |          |
|------------------------------------------------------------|-------------------|-----------------------|----------------|-----------|----------|----------|-----------|----------|----------|
|                                                            |                   |                       |                | 1.6 µg/ml | 10 µg/ml | 80 µg/ml | 1.6 µg/ml | 10 µg/ml | 80 µg/ml |
| Protein calibrator with SIL-protein I.S.                   | GPS               | 0.1~200               | >0.9953        | 91%       | 96%      | 97%      | 3%        | 7%       | 6%       |
|                                                            | TVA               | 0.1~200               | >0.9932        | 90%       | 96%      | 106%     | 4%        | 9%       | 3%       |
| Protein calibrator with SIL-extended-peptide I.S.          | GPS               | 0.1~200               | >0.9945        | 93%       | 95%      | 92%      | 4%        | 6%       | 6%       |
|                                                            | TVA               | 0.1~200               | >0.9917        | 95%       | 94%      | 95%      | 7%        | 3%       | 3%       |
| Protein calibrator with SIL-peptide I.S.                   | GPS               | 0.1~200               | >0.9924        | 100%      | 99%      | 109%     | 6%        | 7%       | 0%       |
|                                                            | TVA               | 0.1~200               | >0.9912        | 94%       | 95%      | 103%     | 5%        | 8%       | 6%       |
| Extended-peptide calibrator with SIL-extended-peptide I.S. | GPS               | 0.1~200               | >0.9963        | 78%       | 74%      | 70%      | 4%        | 6%       | 6%       |
|                                                            | TVA               | 0.1~200               | >0.9931        | 58%       | 67%      | 65%      | 5%        | 3%       | 7%       |
| Peptide calibrator with SIL-peptide I.S.                   | GPS               | 0.1~200               | >0.9974        | 71%       | 68%      | 77%      | 4%        | 7%       | 2%       |
|                                                            | TVA               | 0.1~200               | >0.9915        | 38%       | 39%      | 41%      | 10%       | 8%       | 11%      |

<sup>a</sup> QC samples were prepared by spiking pure protein into blank rat plasma at three levels: 1.6, 10 and 80 µg/mL.

<sup>b</sup> Each sample was analyzed three times in each of two different days (day 1 and day 14).

<sup>c</sup> The purities of all standards were accurately measured by a quantitative AAA procedure, to eliminate bias arising from inaccurate purity of standards.

**SI Table 5. Quantitative data in the time course samples by five different calibration approaches (N=4 animals)**

| Time(h) | Protein calibrator with SIL-protein I.S. |                                 | Peptide calibrator with SIL-peptide I.S. |                                 | Extended-peptide calibrator with SIL-extended-peptide I.S. |                                 | Protein calibrator with SIL-peptide I.S. |                                 | Protein calibrator with SIL-extended-peptide I.S. |                                 |
|---------|------------------------------------------|---------------------------------|------------------------------------------|---------------------------------|------------------------------------------------------------|---------------------------------|------------------------------------------|---------------------------------|---------------------------------------------------|---------------------------------|
|         | GPS                                      | TVA                             | GPS                                      | TVA                             | GPS                                                        | TVA                             | GPS                                      | TVA                             | GPS                                               | TVA                             |
| 1       | Mean±SD<br>( $\mu\text{g/ml}$ )          | Mean±SD<br>( $\mu\text{g/ml}$ ) | Mean±SD<br>( $\mu\text{g/ml}$ )          | Mean±SD<br>( $\mu\text{g/ml}$ ) | Mean±SD<br>( $\mu\text{g/ml}$ )                            | Mean±SD<br>( $\mu\text{g/ml}$ ) | Mean±SD<br>( $\mu\text{g/ml}$ )          | Mean±SD<br>( $\mu\text{g/ml}$ ) | Mean±SD<br>( $\mu\text{g/ml}$ )                   | Mean±SD<br>( $\mu\text{g/ml}$ ) |
| 2       | 48.32±1.31                               | 49.98±7.69                      | 33.72±8.78                               | 20.2±0.65                       | 37.99±2.85                                                 | 30.41±1.82                      | 44.19±11.50                              | 51.36±1.66                      | 49.46±3.73                                        | 45.33±2.73                      |
| 4       | 43.87±2.77                               | 43.97±2.43                      | 31.72±2.27                               | 18.15±2.04                      | 36.58±1.82                                                 | 29.49±1.56                      | 41.57±2.97                               | 46.08±5.22                      | 47.62±2.39                                        | 43.95±2.33                      |
| 6       | 39.92±2.93                               | 40.98±5.03                      | 31.27±1.45                               | 15.90±1.22                      | 32.23±3.59                                                 | 26.88±2.83                      | 40.98±1.90                               | 40.31±3.14                      | 41.91±4.70                                        | 40.04±4.24                      |
| 12      | 37.34±5.08                               | 34.5±2.19                       | 26.24±5.23                               | 15.01±1.46                      | 27.54±4.50                                                 | 21.51±4.95                      | 35.96±3.46                               | 38.03±1.19                      | 35.77±5.90                                        | 32.00±7.41                      |
| 24      | 31.14±2.87                               | 29.01±3.56                      | 22.42±4.41                               | 13.39±1.32                      | 23.05±3.26                                                 | 17.48±2.50                      | 29.38±2.77                               | 33.89±0.96                      | 29.88±5.58                                        | 25.97±3.73                      |
| 48      | 24.31±2.20                               | 23.67±3.49                      | 17.18±3.36                               | 9.64±0.85                       | 16.42±1.59                                                 | 12.90±1.57                      | 23.48±2.73                               | 24.27±2.17                      | 21.18±2.08                                        | 19.78±1.27                      |
| 72      | 17.41±1.89                               | 19.29±2.32                      | 14.97±1.00                               | 7.16±0.87                       | 14.38±0.88                                                 | 10.78±0.94                      | 19.62±0.91                               | 17.96±1.53                      | 18.51±0.75                                        | 16.58±1.01                      |
| 120     | 15.45±1.56                               | 16.56±2.73                      | 13.62±1.78                               | 6.15±0.59                       | 12.52±1.02                                                 | 8.37±1.29                       | 17.05±0.95                               | 15.37±1.52                      | 16.07±1.12                                        | 14.18±0.67                      |
| 168     | 13.26±0.92                               | 12.99±1.27                      | 10.12±0.58                               | 5.64±0.54                       | 10.41±0.94                                                 | 7.07±1.08                       | 13.26±0.76                               | 14.06±1.12                      | 13.3±0.93                                         | 11.71±0.63                      |
| 216     | 11.13±0.62                               | 11.10±0.71                      | 9.83±0.41                                | 4.45±0.53                       | 8.51±0.59                                                  | 5.79±0.90                       | 12.88±0.21                               | 11.01±0.59                      | 10.82±0.77                                        | 10.10±0.80                      |
| 264     | 9.77±0.64                                | 10.89±0.48                      | 7.89±0.37                                | 4.06±0.54                       | 7.88±0.48                                                  | 5.23±0.79                       | 10.73±0.55                               | 10.01±1.38                      | 9.99±0.63                                         | 9.06±0.69                       |
| 360     | 9.26±0.86                                | 8.70±0.74                       | 7.36±0.43                                | 3.53±0.48                       | 7.49±0.50                                                  | 5.16±0.56                       | 9.65±0.31                                | 8.65±1.23                       | 9.49±0.33                                         | 7.99±0.48                       |
| 504     | 6.41±0.44                                | 5.62±0.61                       | 5.04±0.29                                | 2.48±0.27                       | 5.17±0.47                                                  | 3.23±0.55                       | 6.61±0.38                                | 5.91±0.43                       | 6.56±0.75                                         | 6.68±0.67                       |
| 648     | 4.91±0.32                                | 4.49±0.40                       | 3.34±0.52                                | 1.76±0.29                       | 3.41±0.36                                                  | 2.12±0.50                       | 4.38±0.48                                | 4.05±0.42                       | 4.81±0.57                                         | 4.52±0.67                       |
|         | 3.19±0.34                                | 3.07±0.35                       | 2.43±0.49                                | 1.41±0.23                       | 2.70±0.36                                                  | 1.40±0.32                       | 3.19±0.47                                | 3.16±0.34                       | 3.39±0.35                                         | 3.12±0.43                       |
